# Supplementary material
Source: PubMed Central journal article supplement (PMC5552057)
Supplement: NIHMS888053-supplement-Supplement.pdf [file NIHMS888053-supplement-Supplement.pdf]

**Supplementary Table 1. ROC-AUC % (95% confidence limits) for cancer risk models, by smoking exposure and disease type**

| <b>Disease Type</b>       | <b>Pack-Years<sup>a</sup></b> | <b>Cumulative Tar</b>         | <b>Cumulative Tar and Pack-Years</b> | <b>CSI<sup>b</sup></b>       |
|---------------------------|-------------------------------|-------------------------------|--------------------------------------|------------------------------|
| Overall lung cancer       | 76.7 (74.2, 79.1)             | 75.0 (72.5, 77.5)<br>p<0.0001 | 76.7 (74.3, 79.2)<br>p=0.17          | 77.3 (74.9, 79.8)<br>p=0.005 |
| Lung small cell cancer    | 86.9 (82.7, 91.0)             | 85.1 (80.9, 89.4)<br>p=0.017  | 87.1 (82.9, 91.3)<br>p=0.11          | 87.6 (83.4, 91.8)<br>p=0.091 |
| Lung squamous cell        | 86.5 (82.1, 90.8)             | 84.0 (79.4, 88.6)<br>p=0.014  | 86.4 (82.0, 90.8)<br>p=0.47          | 87.1 (82.7, 91.5)<br>p=0.10  |
| Lung large cell cancer    | 81.8 (77.3, 86.2)             | 79.7 (75.1, 84.3)<br>p=0.022  | 81.8 (77.3, 86.2)<br>p=0.45          | 82.5 (78.0, 87.0)<br>p=0.078 |
| Lung adenocarcinoma       | 69.4 (65.8, 73.1)             | 68.2 (64.6, 71.8)<br>p=0.001  | 69.7 (66.0, 73.3)<br>p=0.11          | 70.1 (66.4, 73.7)<br>p=0.025 |
| Overall UADT cancer       | 66.1 (63.2, 68.9)             | 65.2 (62.4, 68.0)<br>p=0.011  | 66.1 (63.2, 68.9)<br>p=0.90          | 66.6 (63.7, 69.4)<br>p=0.021 |
| UADT squamous cell        | 66.4 (63.3, 69.4)             | 65.4 (62.4, 68.5)<br>p=0.012  | 66.4 (63.3, 69.4)<br>p=0.98          | 66.9 (63.8, 69.9)<br>p=0.031 |
| Esophageal adenocarcinoma | 69.9 (63.2, 76.7)             | 69.5 (62.8, 76.2)<br>p=0.54   | 70.0 (63.3, 76.8)<br>p=0.67          | 69.9 (63.1, 76.6)<br>p=0.86  |

<sup>a</sup>Reference variable for the p-values

<sup>b</sup>Comprehensive smoking index

**Supplementary Table 2. Interaction between cumulative tar exposure and race/ethnicity on cancer risk**

| <b>Cancer Type</b> | <b>Adjusted OR (95% CL's) for Tar Tertile 3 vs Never Smokers<sup>a</sup></b> |                    |                               |
|--------------------|------------------------------------------------------------------------------|--------------------|-------------------------------|
|                    | <b>White</b>                                                                 | <b>Non-White</b>   | <b>Interaction Odds Ratio</b> |
| Lung               | 16.65 (10.22, 27.13)                                                         | 5.89 (3.43, 10.10) | 0.36 (0.19, 0.69)<br>p=0.002  |
| UADT               | 2.17 (1.44, 3.27)                                                            | 1.95 (1.09, 3.47)  | 0.75 (0.40, 1.39)<br>p=0.36   |

a. Models adjusted for age, sex, years of education, and drink-years

**Supplementary Table 3. Interaction between cumulative tar exposure and smoking status on cancer risk**

| <b>Cancer Type</b> | <b>Adjusted OR (95% CL's) for Tar Tertile 3 vs Tertile 1<sup>a</sup></b> |                        |                               |
|--------------------|--------------------------------------------------------------------------|------------------------|-------------------------------|
|                    | <b>Former Smokers</b>                                                    | <b>Current Smokers</b> | <b>Interaction Odds Ratio</b> |
| Lung               | 10.80 (6.31, 18.49)                                                      | 36.72 (3.97, 339.96)   | 5.98 (0.66, 54.22)<br>p=0.11  |
| UADT               | 2.96 (1.76, 4.99)                                                        | 6.65 (1.42, 31.02)     | 3.31 (0.82, 13.51)<br>p=0.09  |

a. Models adjusted for age, race/ethnicity, sex, years of education, and drink-years
